# Supplementary material
Source: PubMed Central journal article supplement (PMC3420156)
Supplement: 1110994109_sapp.pdf [file 1110994109_sapp.pdf]

## Supplemental Information.

### Material and Methods

**Source of samples.** The microbial community diversity present in 47 fecal specimens from 35 SIVcpz negative chimpanzees (*Pan troglodytes schweinfurthii*) at the Gombe National Park (Tanzania) was assayed by both 16S rDNA pyrotag and *iTag* sequencing procedures (1–4). After collection, fecal specimens were mixed into an equal volume of RNAlater (Qiagen) and transported to the laboratory, where they were stored at -80°C (5). All samples were typed with genetic markers and could be unequivocally assigned to hosts, such that the sex, age at time of sampling, community affiliation and genealogical relationships are known (6). With few exceptions (Tubi\_2008, Darbee\_2008), we analyzed a sample collected between October and December 2008 from each chimpanzee. Note that some of the selected hosts reside in a different geographic community than their parents, grandparents, and/or siblings, and that some have many different levels of kinship to other hosts whose microbiotae were assayed (Fig. 1). For seven chimpanzee hosts, we selected samples from additional years collected during the same three-month interval. For one sample (Gremlin\_2000, GM7), we performed multiple technical replicates to evaluate the reproducibility of our experimental methods (Table S1).

**Sample preparation and pyrotag sequencing.** Total DNA was extracted from fecal samples using the QIAmp DNA stool kit according the manufacturer's instructions (Qiagen). DNA was quantified with the PicoGreen DNA assay (Invitrogen) on a Victor X3 plate reader (Perkin Elmer). Total fecal DNA was used as template to amplify fragments corresponding to the V6–V9 region of 16S ribosomal RNA using the universal primers 926F and 1492R (sequences in lower case below). To multiplex samples onto a single sequencing run, 50 forward primers

were designed as fusions of the 454 FLX Titanium Lib-L 'A' sequencing primer, a 2-nucleotide spacer, an 8- or 10-nucleotide barcode (designated by **N**'s) and a conserved 16S rDNA sequence (primer **TAXX-926F**: 5'-CCA TCT CAT CCC TGC GTG TCT CCG ACT CAG-**NNNNNNNN**-CT-aaa ctY aaa Kga att gac gg-3'). All reactions used the same reverse primer whose sequence included a conserved 16S sequence separated by a two nucleotide spacer to the 454 FLX Titanium Lib-L 'B' sequencing primer (primer **TB-1492R**: 5'-CCT ATC CCC TGT GTG CCT TGG CAG TCT CAG-TC-tac ggY tac ctt gtt acg act t-3').

Each DNA sample was amplified in triplicate 30 µl reactions using 0.4 U of Phusion DNA polymerase (NEB), 1X final concentration of HF buffer, 0.5 µM each primer, 200 µM dNTPs and 3–10 ng of template DNA. Reactions were denatured for 1 minute at 98°C then cycled 20 times at 98°C for 10 seconds, 55°C for 10 seconds, and 72°C for 15 seconds, followed by a final elongation step at 72°C for 5 minutes. Individual reactions from each sample were pooled, verified on 1.0% agarose gels, purified with the MinElute PCR purification kit (Qiagen), and quantified with the PicoGreen DNA assay. Equimolar amounts of amplicons were mixed and submitted for pyrosequencing using primer 'A' of the Lib-L kit. Technical replicates were performed on the DNA isolated from host GM7 using primers having the same or different barcode sequences to assess sample reproducibility (Table S1).

**Pyrotag processing.** Raw pyrosequencing reads were first quality trimmed with **Lucy** using an error rate of 0.5% (equivalent to **Phred** quality score of 23) set for the maximum average error and errors at the ends. Following this initial quality trimming, any reads less than 260 nucleotides in length, or that still contained undefined bases (**N**'s) or lacked perfect barcode and primer sequences, were removed. Remaining reads were trimmed to 260 nucleotides from

the 3' end of the forward primer. Taxonomic assignments of the quality-trimmed reads (aka "pyrotags") were performed with the **RDP classifier** (7), and any sequence read matching plant chloroplast sequences was removed.

The trimmed, taxonomically assigned sequences were de-replicated to yield the set of unique pyrotags (100% OTUs), which were then queried against the **Silva** database using **BlastN** to identify eukaryotic and chimeric sequences. To be deemed as eukaryotic in origin, sequences were required to match have  $\geq 80\%$  nucleotide identity and an E-value  $< 10^{-40}$  to an eukaryotic ssuRNA, and pyrotags with  $\geq 90\%$  identity to a restricted section ( $< 90\%$ ) of a known sequence were considered chimeras. Chimeric sequences were also identified with **UCHIME** using the *de novo* detection algorithm with default parameters (8). Read filtering removed 17,424 high-quality, eukaryotic pyrotags, the majority derived from unicellular eukaryotes (16,399/17,424) and dominated by Trichomonads and *Blastocystis* spp. Although these pyrotags represent non-specific PCR amplification and relative abundances are unreliable, 33 of the 35 nominally healthy chimpanzees were positive for one or both of these eukaryotic parasites. Previous surveys have directly enumerated the persistence and prevalence of gastrointestinal parasites within these chimpanzee communities (9–11). Sample TA39 harbored a highly atypical community, with  $> 60\%$  of the reads assigned to the genus *Tetragenococcus*, which was otherwise very rare or lacking (constituting only 47/645,769 reads) in the remaining samples. Therefore, this sample was removed and all analyses were performed on the microbial communities of 34 chimpanzees.

All of the remaining unique tags were aligned with the **RDPaligner** and clustered at a range of similarity values using the **RDP** website (90 – 99%). Using custom Perl scripts, unique

reads were inflated to add back all constituent tags in order to reflect actual read abundances and clusters at each similarity cutoff were partitioned by sample. After this processing step, clusters represented by tags derived from a single chimpanzee fecal sample were removed, as they are not phylogenetically informative clusters and may represent amplification artifacts or contamination. Using the **RDP** web resources, Shannon diversity, Evenness, Sørensen distances and rarefaction curves were estimated. Additional diversity measures (e.g., Morsita-Horn) were calculated with **EstimateS** (12). In addition, raw 454 flowgrams were treated as above and then subjected to denoising procedures, as implemented in QIIME (13) using default parameters for 454-Titanium reads (`denoise_wrapper.py`), in order to remove any spurious phylotypes that might be generated during the clustering procedures.

**Statistical analyses.** Based on the occurrences and abundances of 99% OTUs (i.e., clusters of pyrotag sequences that differ by 1% or less) that were present in two or more samples, we generated abundance tables (formatted for **PC-ORD** v4.25; 14) relating the abundance of each OTU present in the samples collected in 2008 from 35 hosts and for the longitudinal samples (from 2000, 2001, and 2008) available for seven hosts. Outlying samples (TA39) and technical replicates were not included (TA05, TA52). Separate sample tables describing the sex, community affiliation, age, and sampling date of individuals were also produced. Initial nonmetric multidimensional scaling (NMS) analyses were performed using the “autopilot” mode to determine an appropriate number of axes. Autopilot first calculates between sample diversity (Sørensen distances) and then performs multiple ordinations using 1–4 axes determining the “stress” index of real and randomized data for each dimensionality. The optimal number of axes is defined as the number of dimensions (n) that reduce the final stress

by  $\geq 5$  relative to  $n-1$  axes and has a final stress  $< 95\%$  of the randomized data. Using a random starting seed, both data sets were re-run with the optimal number of axes, a stability criterion of 0.00001 (standard deviation in stress for preceding 10 iterations), and  $p$ -values were determined through Monte Carlo simulation.

Using **PC-ORD**, we performed multi-response permutation procedures (MRPP) to further characterize patterns observed in the NMS results. Sørensen distances were used to calculate chance-corrected within-group agreement (A) of samples grouped by individual characteristics, such as sex, community affiliation, age, and sampling date. To identify those 99% OTUs significantly associated with a particular sample characteristic, we applied an Indicator species analysis (15), with the significance of observed maximum indicator values (IV) tested by Monte Carlo simulations. These statistical procedures were also performed on randomly resampled data ( $n = 8,250$  tags / sample) to assess the variation that may arise due to differences in the total number of tags recovered per sample. Departures from the patterns observed with the real data (if any) are recorded in the results.

**Community phylogenetic reconstructions.** Absolute abundances were converted to log abundances and formatted for **PAUP** 4b10 (16) as in (1). Phylogenies inferring the relatedness of samples based on their microbial community compositions and the bootstrap support for branching orders in these phylogenies were generated using default Parsimony and Neighbor-joining parameters.

**Integrating data of Gombe chimpanzees with previous analyses of great ape microbiotae.** The original pyrotag sequences obtained for fecal samples from five great ape species (1) were retrieved, quality trimmed and processed as described above. The filtered pyrotags were

combined with filtered tags recovered from the samples from the Gombe chimpanzees (this study), resulting in a large number (>200,000) of unique OTUs. OTUs present in a single sample were removed, and the remaining 100% OTUs aligned and clustered in the **RDP** pipeline (7). Nonmetric multidimensional scaling and phylogenetic analyses were carried out as described.

***Illumina tag (iTag) sequencing.*** To examine changes in gut microbial communities at a very high level of resolution, we implemented an *Illumina*-based 16S-tag procedure that is analogous in principal to the pyrotag procedure described above, but differs by interrogating a 100-nt region from the 5'-end of amplicons spanning the V4 region of 16S rDNA (2). Because the short read-lengths produced by this method both hampers the phylogenetic assignment of large proportions of the sequencing reads and precludes direct comparisons to available pyrotags that targeted other regions of the 16S rDNA molecule, we applied these procedures to (i) monitor phylotype diversity within individual hosts over time, and (ii) examine the effects of long-term sample storage on changes in phylotype diversity.

DNA was extracted from faecal samples by a bead-beating method (17), cleaned using a QIAGEN QIAquick PCR purification kit and diluted to 25 ng/μl. PCR reaction were carried out in triplicate 25-μl reactions using universal forward primer F515 (5'- AAT GAT ACG GCG ACC ACC GAG ACG TAC GTA CGG Tgt gcc agc mgc cgc ggt aa) and universal reverse primer R806 (CAA GCA GAA GAC GGC ATA CGA GAT-**NNNNNNNNNNNN**-AGT CAG TCA GCC-gga cta chv ggg twt cta at), each fused to the *Illumina* adaptor-sequences. Note that reverse primers were indexed with a unique 12-nucleotide barcode sequences (designated by **N**'s) situated between *Illumina* adaptor sequence and the R808 conserved sequence (lower case), thereby allowing us to multiplex all samples into a single *Illumina* flowcell. Triplicate reactions were pooled and

purified using AMPure XP beads (Beckman Coulter Genomics), quantified using Quant-iT PicoGreen (Invitrogen), combined in equimolar amounts, and run over a QIAquick column (QIAGEN) for final purification. Samples were sequenced at the Yale Center for Genome Analysis using *Illumina* HiSeq 2000 technology.

*iTags* were generated for a total of 39 samples, which represent annual samples spanning 10 consecutive years for seven chimpanzees that were also surveyed at multiple time-points by the pyrotag procedure (Table S4). Initial quality filtering was performed in **Qiime v1.3**, using default parameters (12), which was then applied to determine OTUs using a closed reference picking protocol against precomputed 97% and 99% **Greengenes** OTUs with the **UCLUST** algorithm. OTUs were further culled by removing those identified in only a single sample and/or found at abundance <0.01% of the total number of reads, noting that such aggressive quality-trimming is essential when using *Illumina*-based 16S tag approaches (16, 18).

## Literature Cited

1. Ochman H, et al. (2010) Evolutionary relationships of wild hominids recapitulated by gut microbial communities. *PLoS Biol* 8:e1000546.
2. Caporaso JG, et al. (2011) Global patterns of 16S rRNA diversity at a depth of millions of sequences per sample. *Proc Natl Acad Sci USA* 108:4516–4522.
3. Hamady M, Walker JJ, Harris JK, Gold NJ, Knight R (2008) Error-correcting barcoded primers for pyrosequencing hundreds of samples in multiplex. *Nat Methods* 5:235–237.
4. Degnan PH, Ochman H (2012) *Illumina*-based analysis of microbial community diversity. *ISME J*, 6:183–194.

5. Keele BF, et al. (2009) Increased mortality and AIDS-like immunopathology in wild chimpanzees infected with SIVcpz. *Nature* 460:515–519.
6. Constable JL, Ashley MV, Goodall J, Pusey AE (2001) Noninvasive paternity assignment in Gombe chimpanzees. *Mol Ecol* 10:1279–1300.
7. Cole JR, et al. (2009) The Ribosomal Database Project: improved alignments and new tools for rRNA analysis. *Nucleic Acids Res* 37:D141–D145.
8. Edgar RC, Haas BJ, Clemente JC, Quince C, Knight R (2011) UCHIME improves sensitivity and speed of chimera detection. *Bioinformatics* 27:2194-2200.
9. File SK, McGrew WC, Tutin CE (1976) The intestinal parasites of a community of feral chimpanzees, *Pan troglodytes schweinfurthii*. *J Parasitol* 62:259–261.
10. Bakuza, JS, Nkwenguilila G. (2009) Variation over time in parasite prevalence among free-ranging chimpanzees in Gombe National Park, Tanzania. *Int J Primatol* 30:40–53.
11. Gillespie TR, et al. (2010) Demographic and ecological effects of patterns of parasitism in eastern chimpanzees (*Pan troglodytes schweinfurthii*) in Gombe National Park, Tanzania. *Amer J Phys Anthropol* 143:534–544.
12. Colwell RK (2009) User's Guide to EstimateS Vers. 8.2: Statistical estimation of species richness and shared species from samples. Online User's Guide. University of Connecticut. 22 pp.
13. Caporaso JG, et al. (2010) QIIME allows analysis of high-throughput community sequencing data. *Nature Methods* 7:335–336.
14. McCune B, Medford MJ (1999) PC-ORD: multivariate analysis of ecological data. Version 4. MJM, Glenden Beach, OR.



15. Dufrêne M, Legendre P (1997) Species assemblages and indicator species: the need for a flexible asymmetrical approach. *Ecol Monogr* 67:345–366.
16. Swofford DL (2004) PAUP\*: Phylogenetic Analysis Using Parsimony (and Other Methods). Sinauer Associates, Inc., Sunderland, MA.
17. Goodman AL, et al. (2011). Extensive personal human gut microbiota culture collections characterized and manipulated in gnotobiotic mice. *Proc Natl Acad Sci USA* 108:6252–6257.
18. Degnan PH, Ochman H (2012) *Illumina*-based analysis of microbial community diversity. *ISME J*, 6:183–194.

**Fig. S1. Relative taxon abundances of Gombe chimp 16S rRNA pyrotags.** Stacked Bar graphs illustrate the abundances of **(A)** Phyla **(B)** Class assignments for quality trimmed and clustered 99% OTUs as determined by the RDP Classifier for the 50 pyrotag chimp samples.

**Fig. S2. Comparison of alpha diversity (Shannon's H) of gut microbial communities and age of individual.** Alpha diversity indices were calculated for each of the 34 samples collected in 2008 and plotted by the age of each individual. (Infants, 0-5 yrs.; Juveniles, 6 – 8 yrs.; Adolescents, 9 – 15 yrs., Adults, 16 – 33 yrs.; Elderly, > 33 yrs.) Nonparametric tests revealed that infants and juveniles had slight but significantly greater microbial community diversity than did adults. The negative slope estimated from a linear regression also suggests this subtle trend.

**Fig. S3. Proportions of shared OTUs among longitudinally sampled chimps.** Venn diagrams are used to represent the numbers of recurring 99% OTUs identified in six chimpanzees sampled over an 8 year period **(A–F)**. Labels adjacent to each colored circle (2000 - yellow, 2001 - orange, and 2008 - green) indicate the sample number, year and total number of 99% pyrotag reads recovered. Numbers in each sector indicate the corresponding number of OTUs (**bold**) and average percentage of reads (roman).

**Fig. S4. Nonmetric multidimensional scaling ordination of denser longitudinal sampling of chimps.** Using iTags, the 20 original temporal samples from 2000, 2001 and 2008 (**bold**) and 19 additional fecal samples from intervening years (roman) were sequenced, clustered into 99% OTUs and analyzed using NMS ordination. Similar to the pyrotag results presented in Figure 5,

samples from 2000 (blue) and 2001 (red) more or less overlap in the ordination space and samples from 2008 (yellow) are largely distinct. The key denotes the year and individual of the samples and ellipses encompasses all of the samples from 2000 (blue), 2001 (red) and 2008 (yellow). Related chimpanzees are indicated by the superscripts <sup>1</sup>Sparrow is the mother of Sheldon and Sandi; <sup>2</sup>Darbee and Tubi are presumed to be half-sibs.

**Fig. S5 Gombe chimps exhibit stable core community through time.** Shared OTUs from each temporal sample are represented as heatmaps in which the height of each row within columns (representing a samples from the designated year) is proportional to the number of OTUs (labeled at left). Cells are colored-coded according to the  $\log_{10}$  transformed read abundance of those shared OTUs from the sample indicated.

**Fig. S6. Alpha diversity values estimated from iTag data within chimps and through time.**

Microbial diversity estimates for fecal samples collected over a nine-year period were calculated to examine changes in diversity that might result from DNA degradation during sample storage. Although there are differences observed among sample estimates of Shannon's H within chimpanzees (A) and between years (B), there is no systemic bias leading to inflated diversity estimates in all older samples.

Figure S1

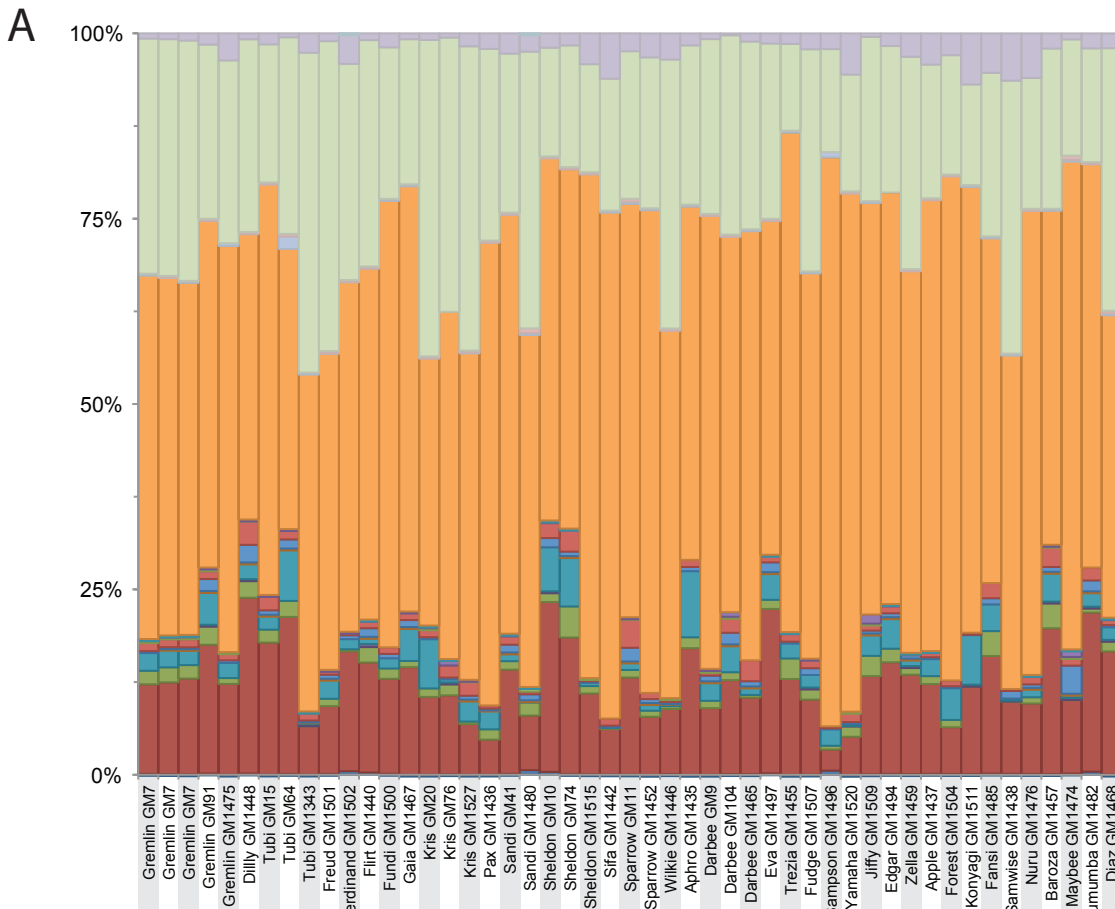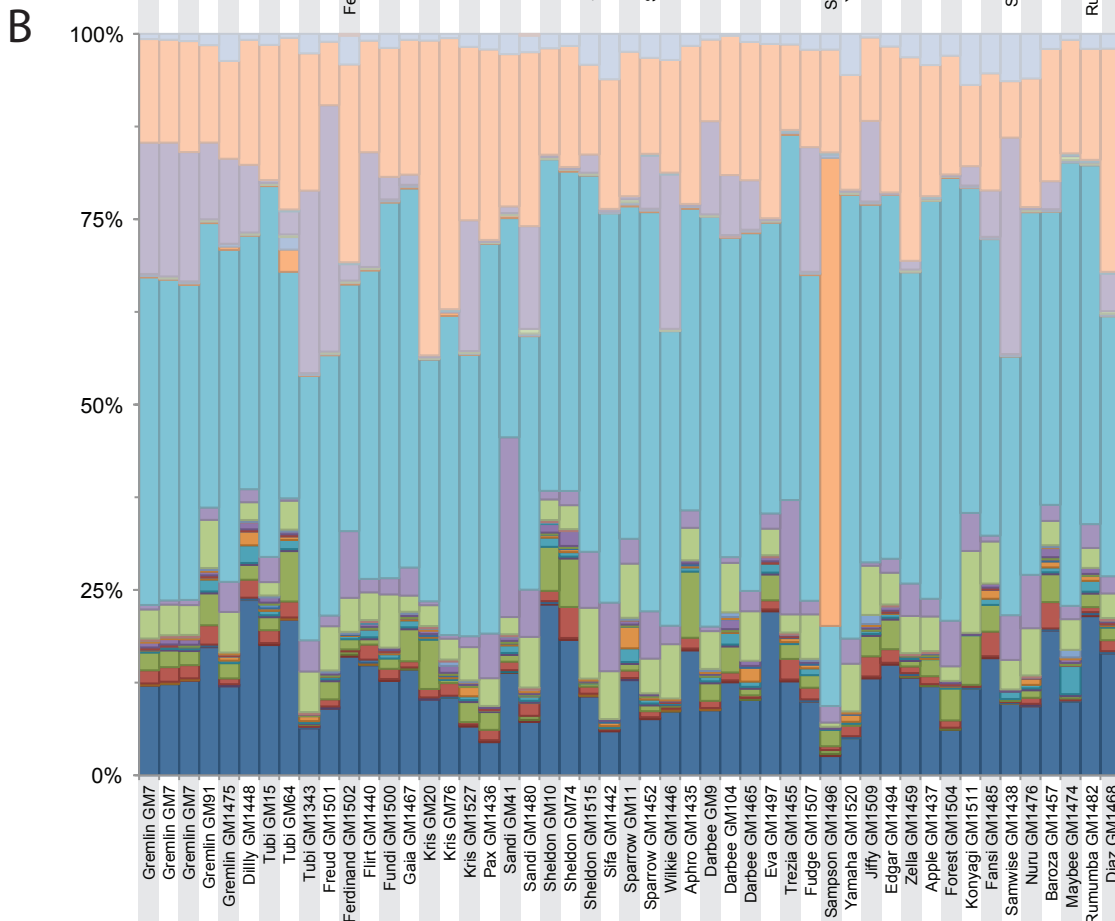

Figure S2

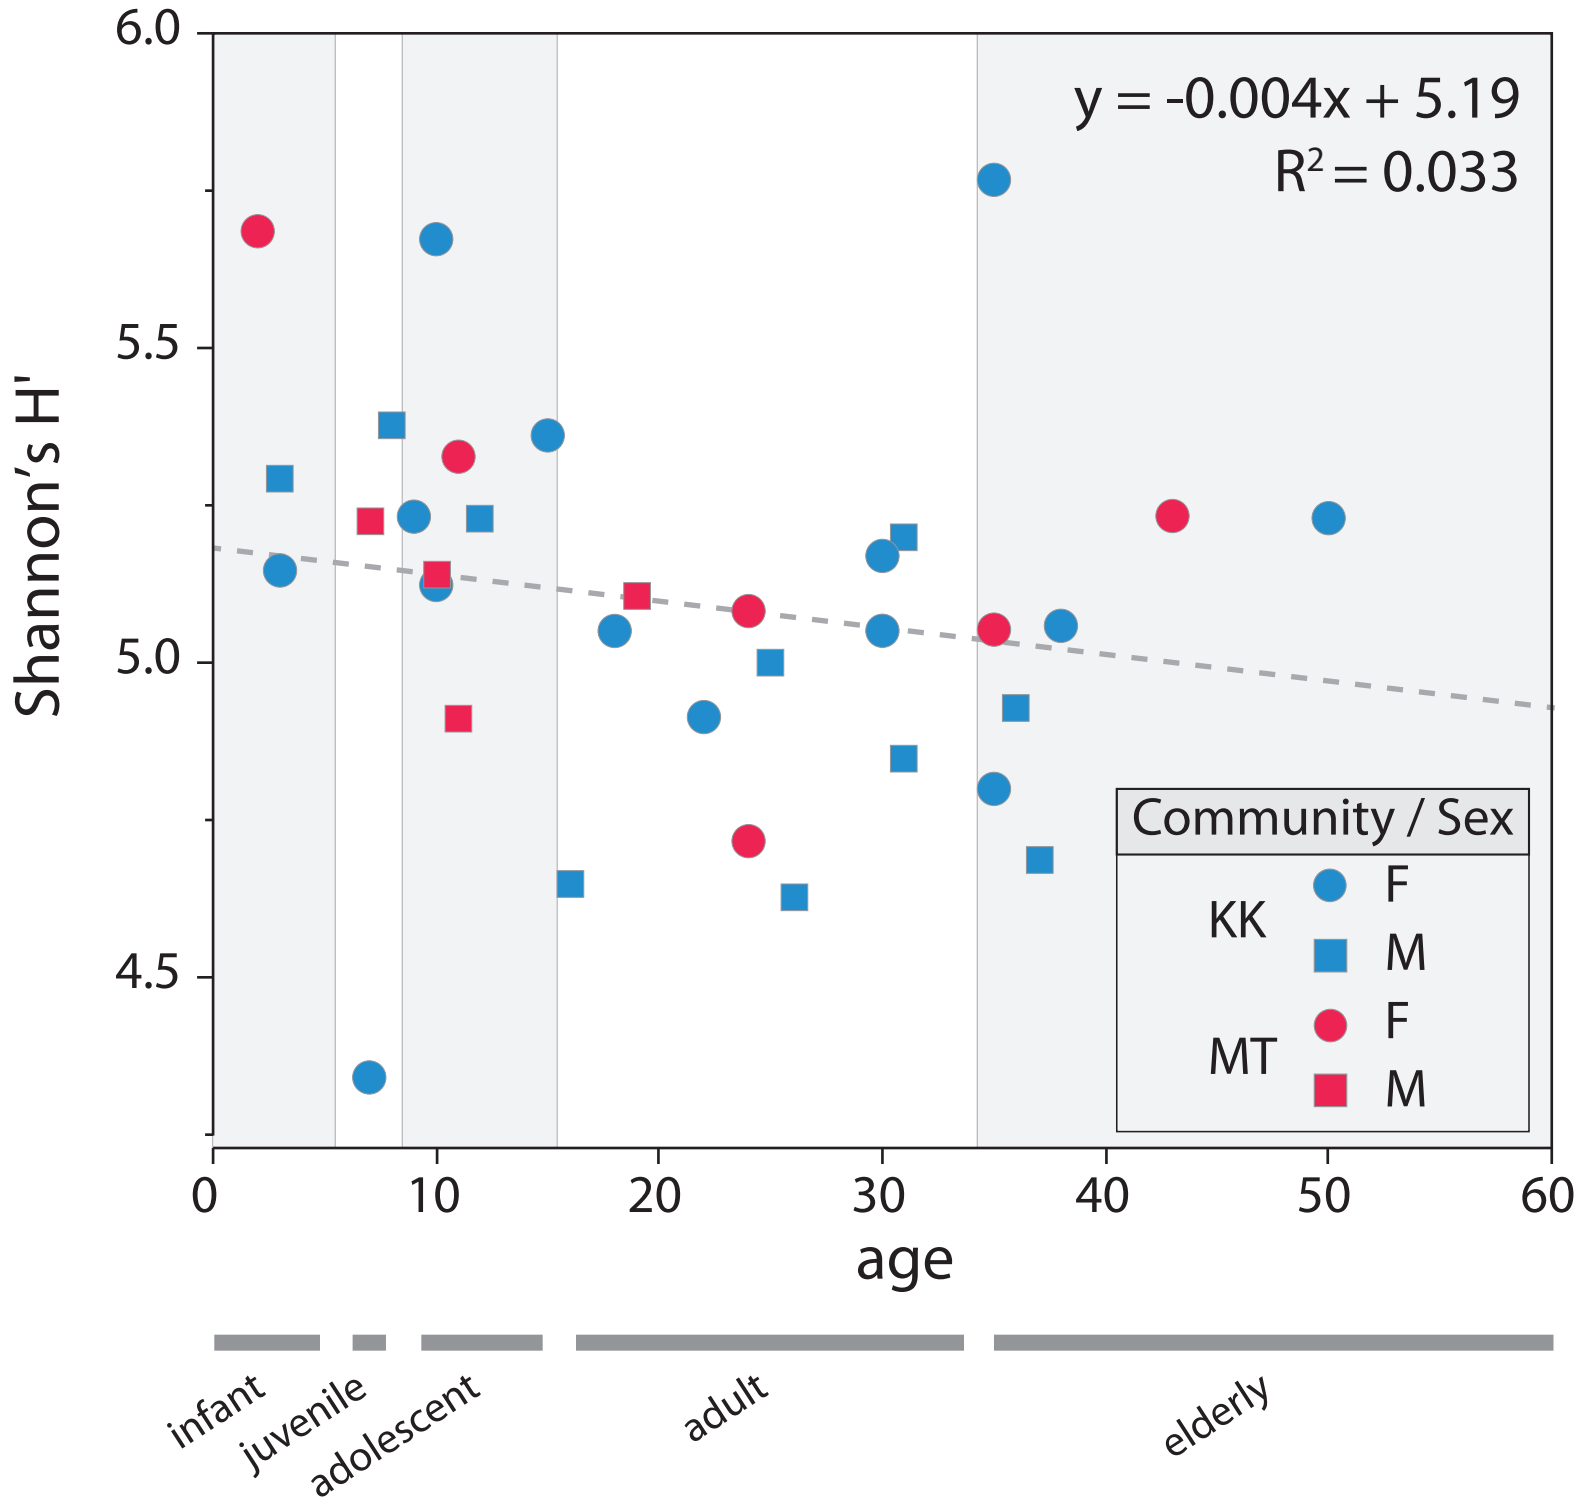

Figure S3

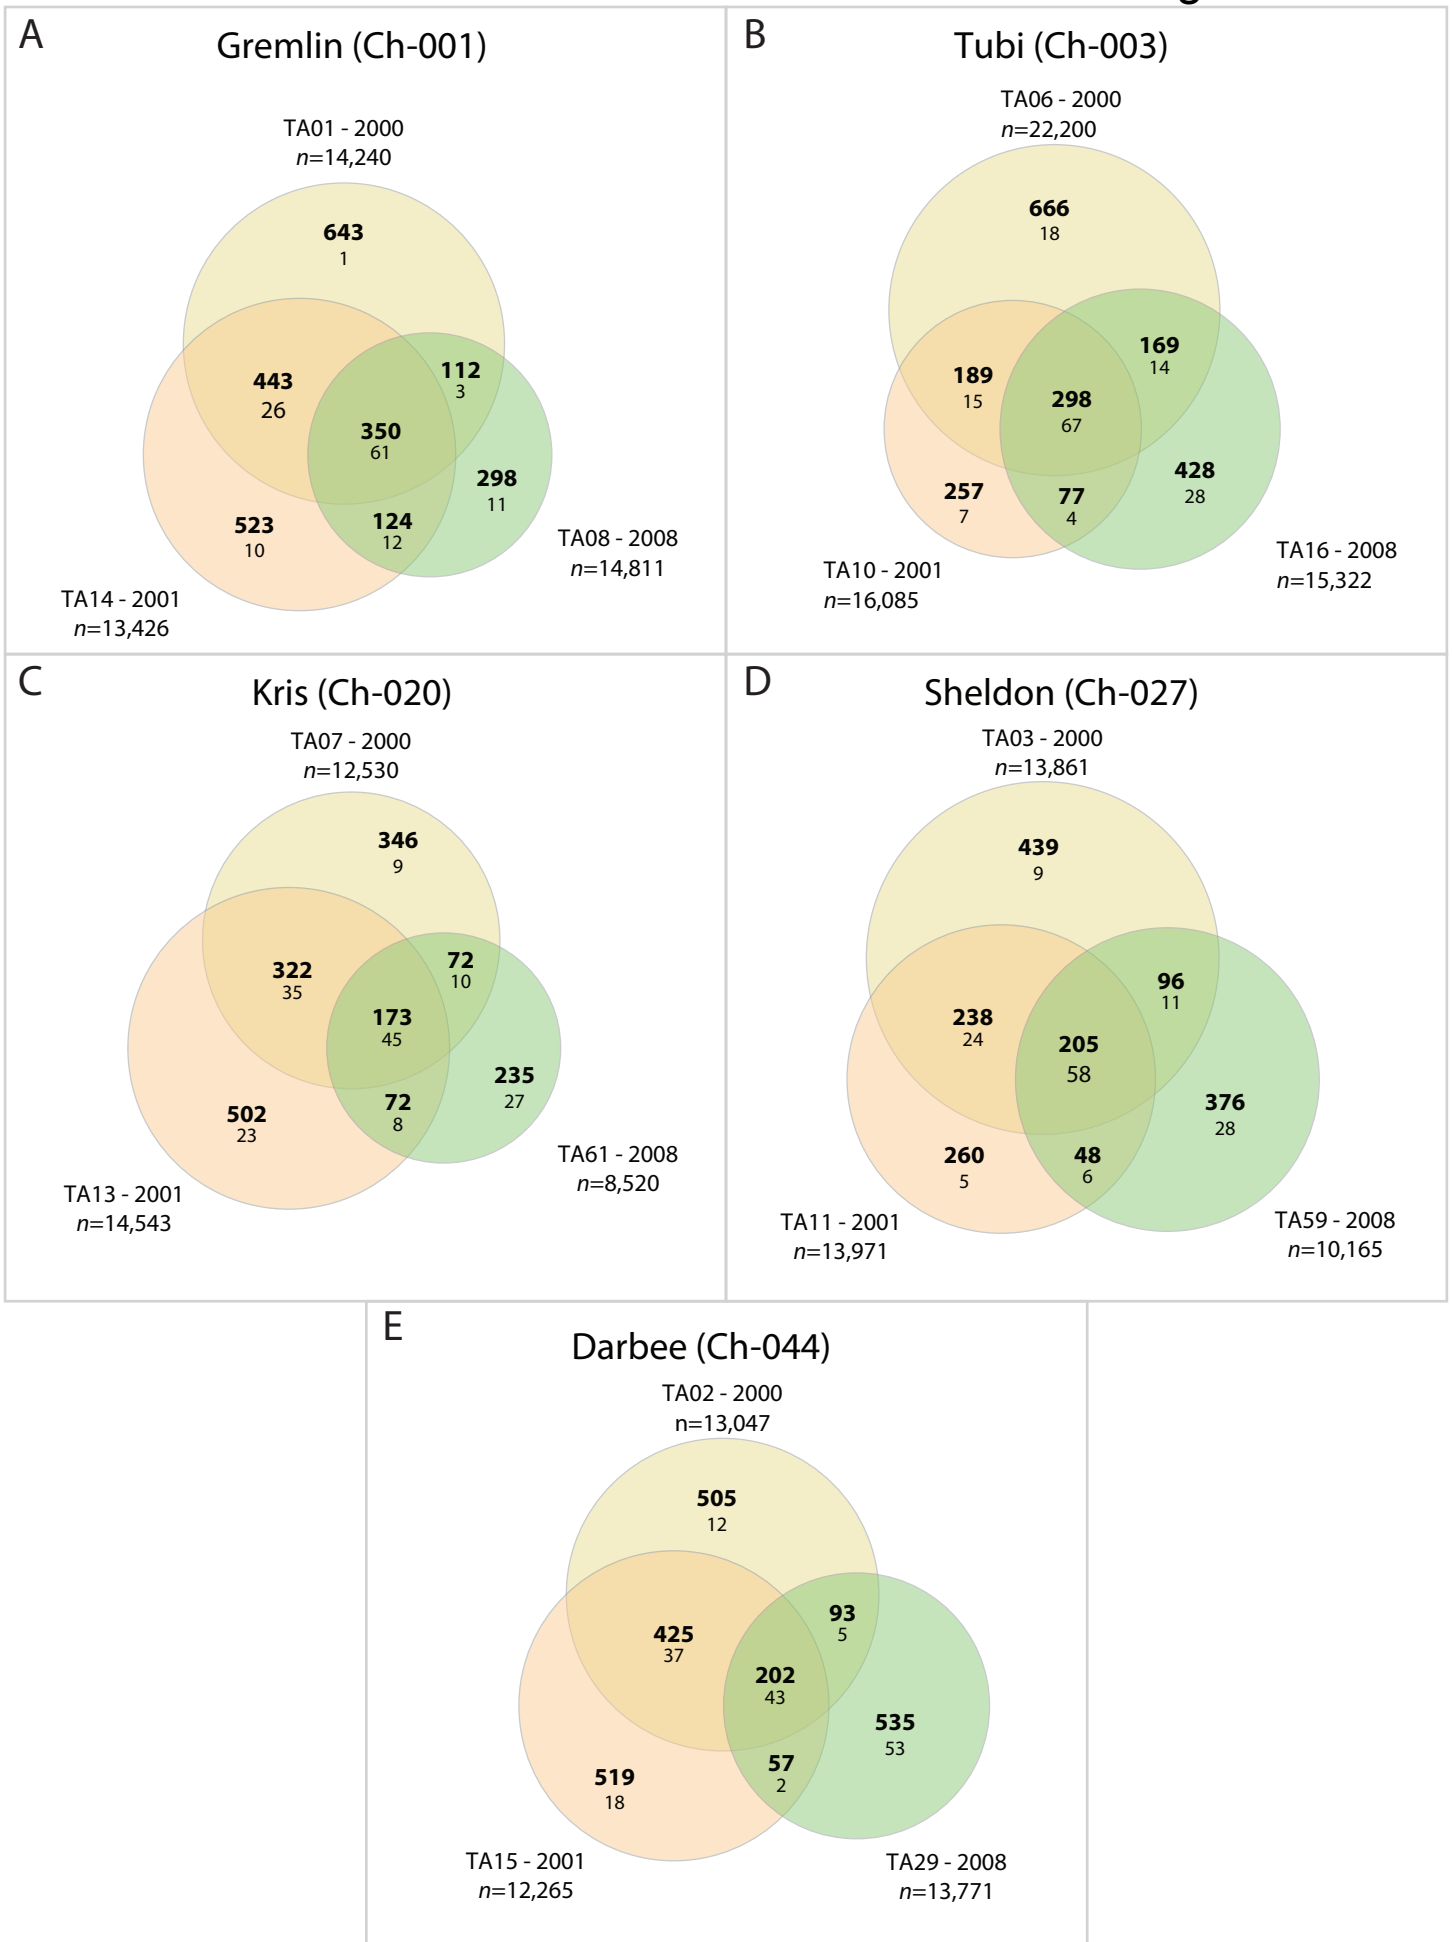

Figure S4

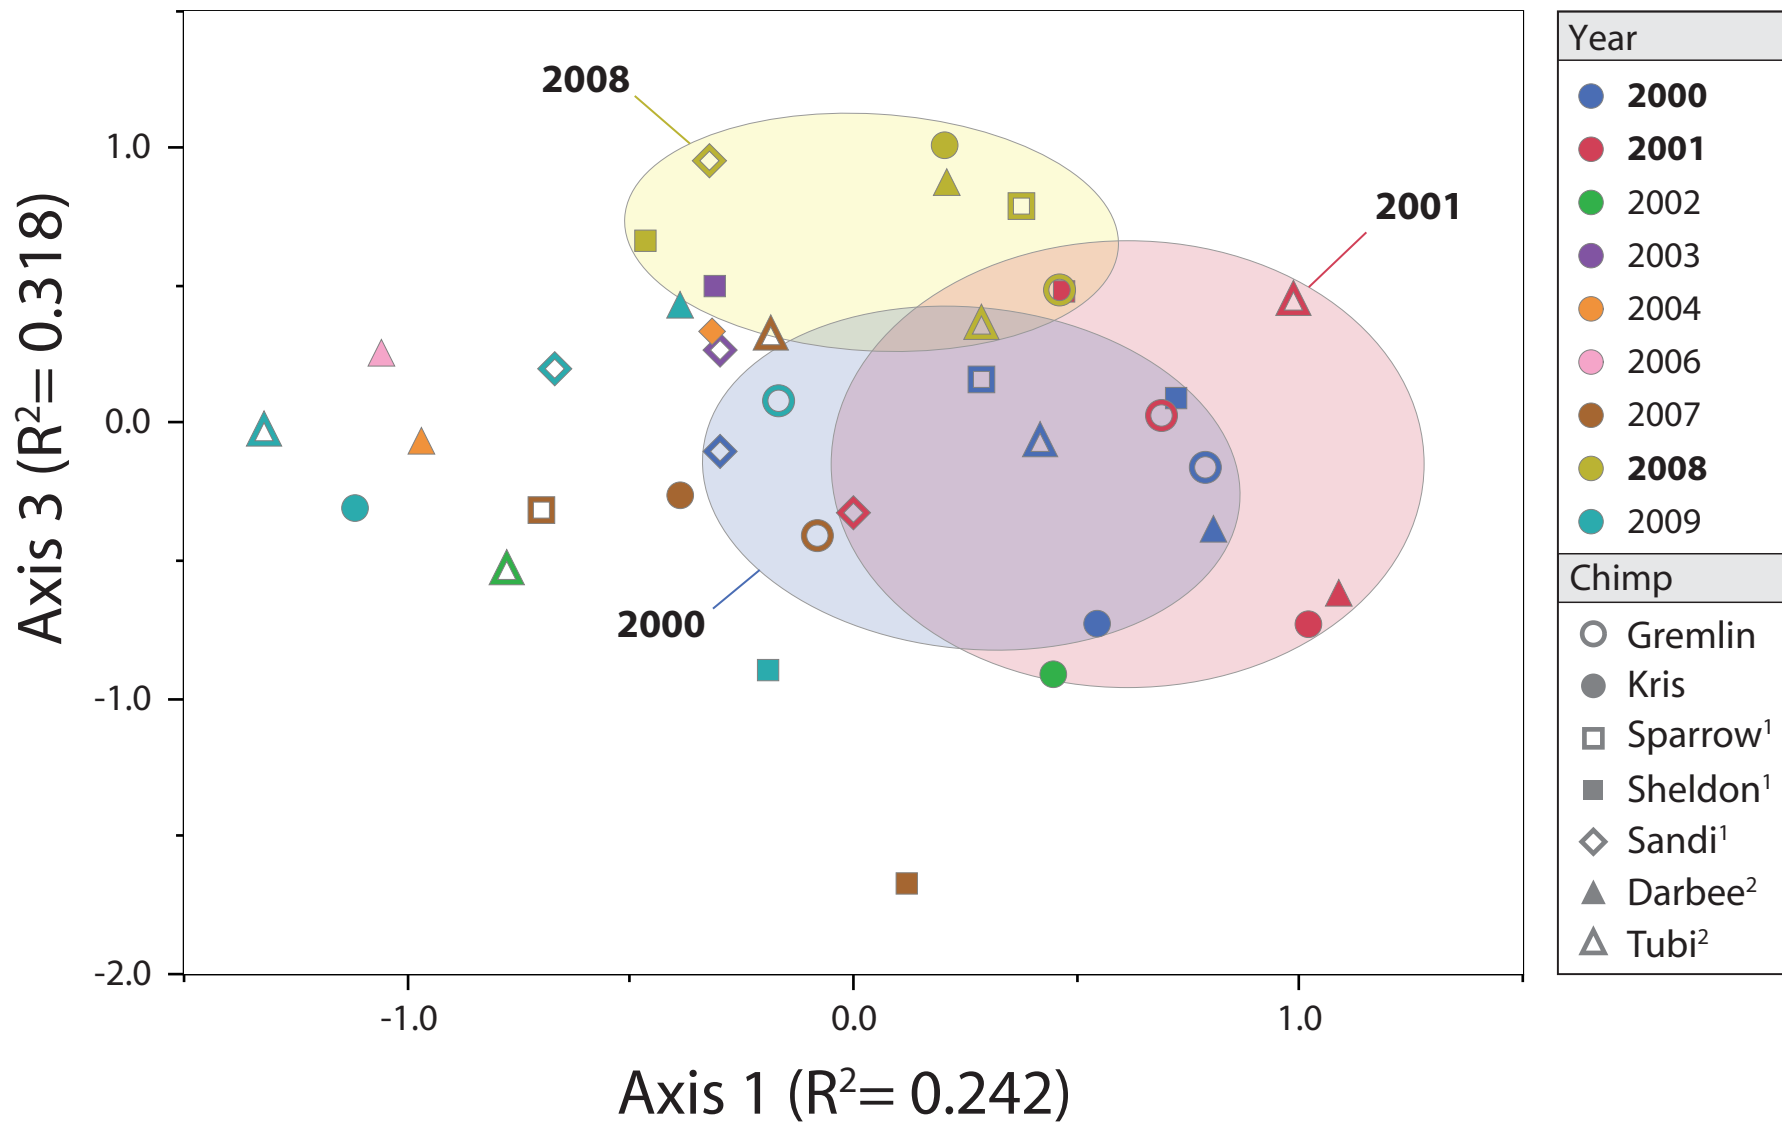

Gremlin

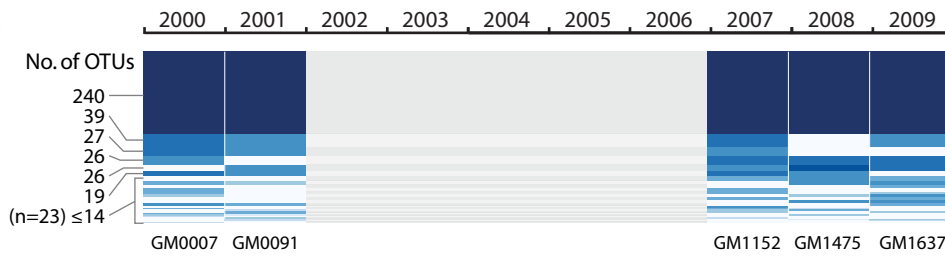

Kris

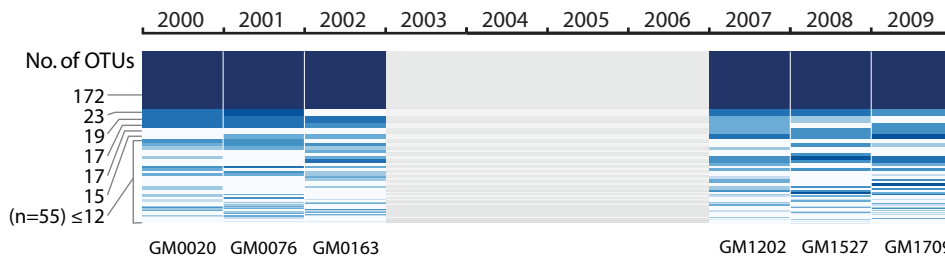

Sparrow

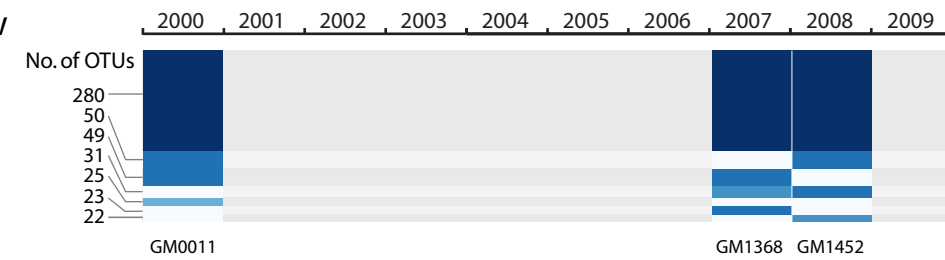

Sheldon

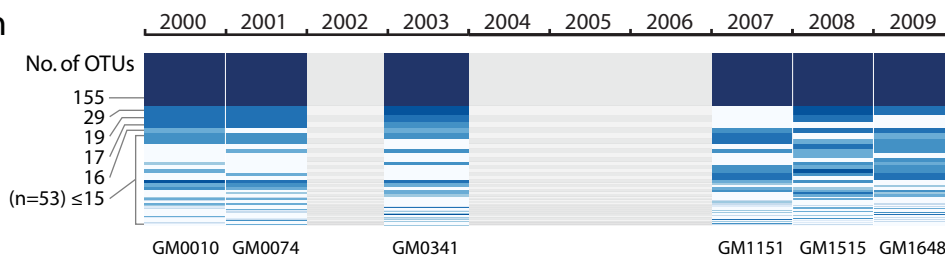

Sandi

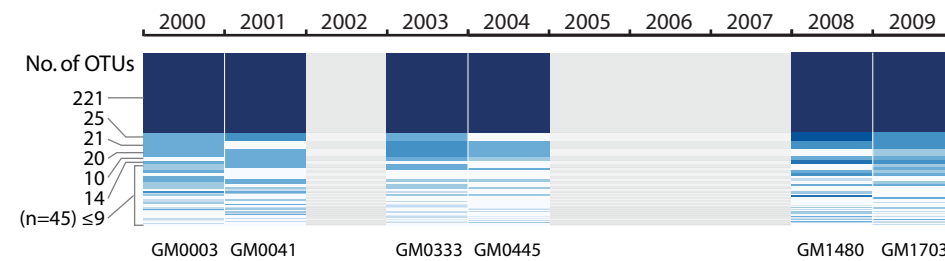

Darbee

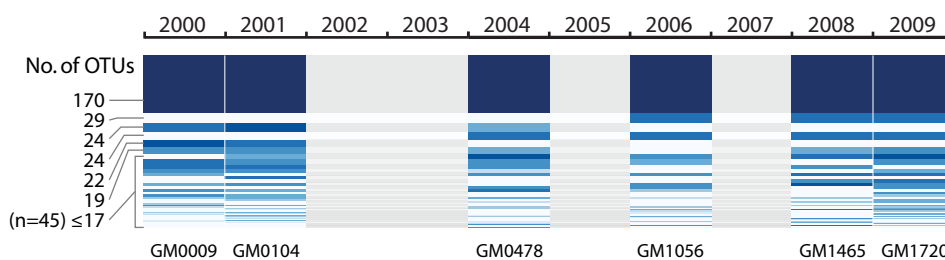

Tubi

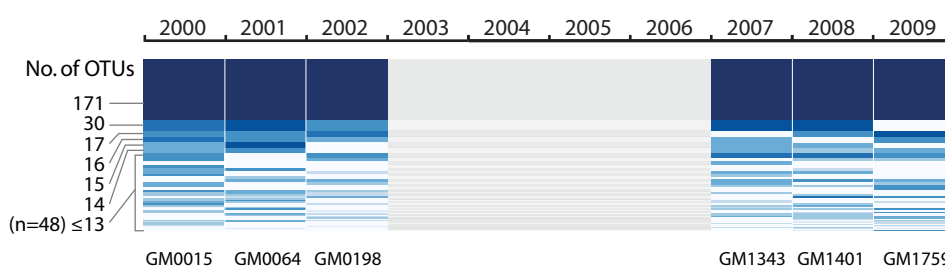

Color Key

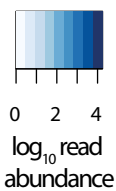



Figure S6

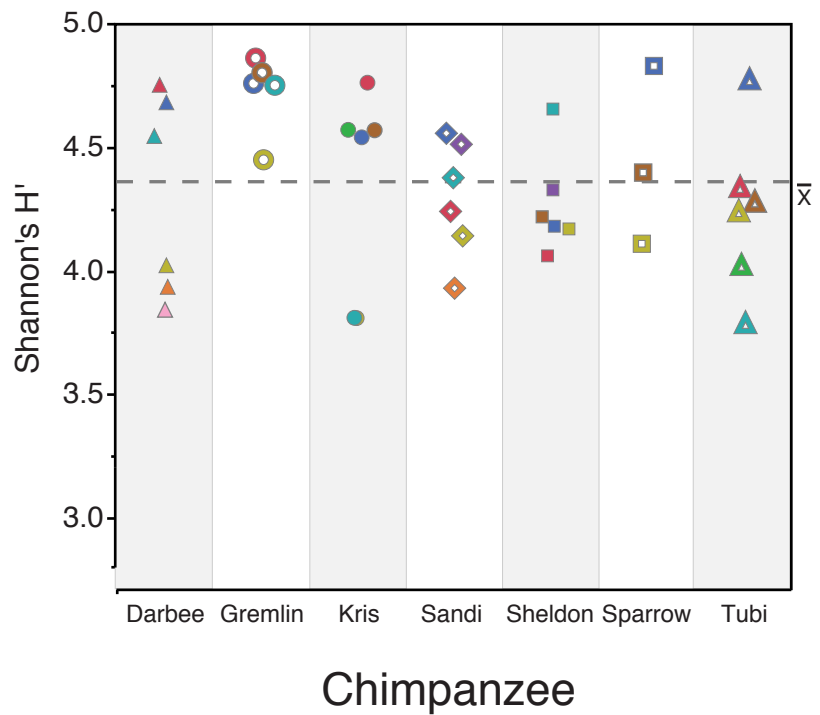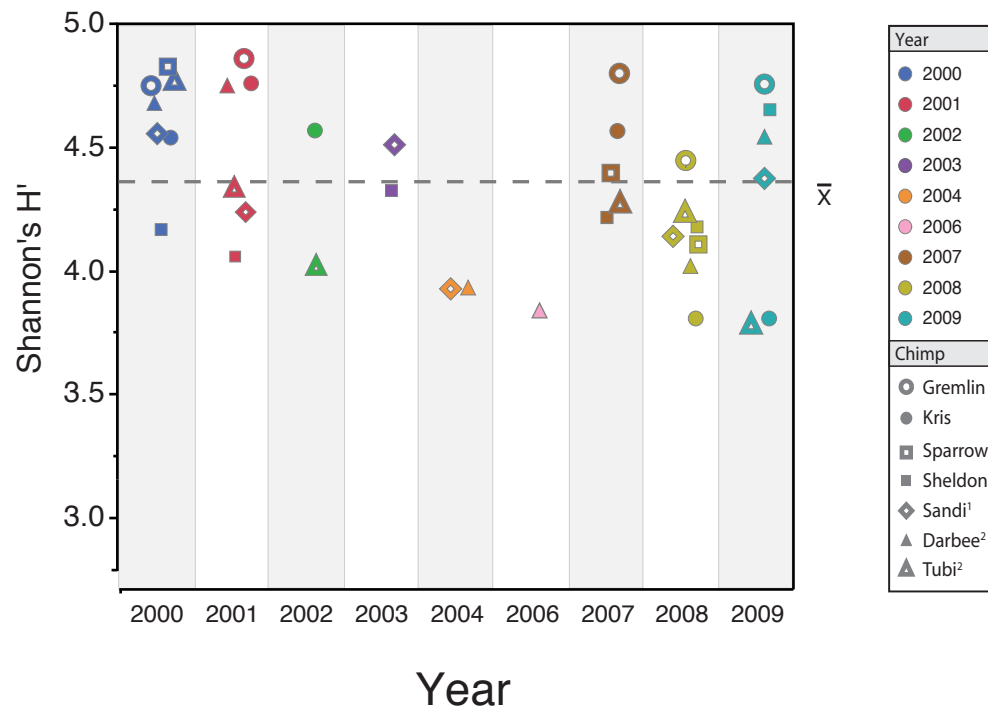

**Table S1.** Summary of pyrosequenced Gombe chimp samples

| Sample tag | Barcode  | Name    | Abbr. | Chimp  | Sex | Community <sup>1</sup> | YOB <sup>2</sup> | Age when collected | Sample number | Total No. of processed reads <sup>3</sup> |
|------------|----------|---------|-------|--------|-----|------------------------|------------------|--------------------|---------------|-------------------------------------------|
| TA01       | ACAGCACT | Gremlin | GM    | Ch-001 | F   | KK                     | 1970             | 30                 | GM7           | 14,752                                    |
| TA02       | ACAGCTCA | Darbee  | DB    | Ch-044 | F   | MT                     | 1984             | 17                 | GM9           | 13,662                                    |
| TA03       | ACGAGTAG | Sheldon | SL    | Ch-027 | M   | KK                     | 1983             | 17                 | GM10          | 14,014                                    |
| TA04       | ACGTACGT | Sparrow | SW    | Ch-031 | F   | KK                     | 1958             | 42                 | GM11          | 15,416                                    |
| TA05       | ACTCACAG | Gremlin | GM    | Ch-001 | F   | KK                     | 1970             | 30                 | GM7           | 18,515                                    |
| TA06       | ACTCGTGA | Tubi    | TB    | Ch-003 | M   | KK                     | 1977             | 23                 | GM15          | 22,563                                    |
| TA07       | ACTGCAGT | Kris    | KS    | Ch-020 | M   | KK                     | 1982             | 19                 | GM20          | 12,747                                    |
| TA08       | AGACGACA | Gremlin | GM    | Ch-001 | F   | KK                     | 1970             | 38                 | GM1475        | 14,896                                    |
| TA09       | AGACTCTG | Sandi   | SA    | Ch-025 | F   | KK                     | 1973             | 28                 | GM41          | 16,617                                    |
| TA10       | AGAGCAGT | Tubi    | TB    | Ch-003 | M   | KK                     | 1977             | 24                 | GM64          | 16,192                                    |
| TA11       | AGCAGTAG | Sheldon | SL    | Ch-027 | M   | KK                     | 1983             | 19                 | GM74          | 14,036                                    |
| TA13       | AGTCGTCA | Kris    | KS    | Ch-020 | M   | KK                     | 1982             | 20                 | GM76          | 14,939                                    |
| TA14       | AGTGACAG | Gremlin | GM    | Ch-001 | F   | KK                     | 1970             | 31                 | GM91          | 13,898                                    |
| TA15       | AGTGCTCA | Darbee  | DB    | Ch-044 | F   | MT                     | 1984             | 18                 | GM104         | 12,616                                    |
| TA16       | ATCGCGTA | Tubi    | TB    | Ch-003 | M   | KK                     | 1977             | 31                 | GM1343        | 15,566                                    |
| TA17       | ATGCGCTA | Aphro   | AP    | Ch-042 | F   | MT                     | 1973             | 35                 | GM1435        | 14,092                                    |
| TA18       | CACTCAGA | Pax     | PX    | Ch-023 | M   | KK                     | 1977             | 31                 | GM1436        | 16,131                                    |
| TA19       | CACTGAGT | Apple   | APL   | Ch-063 | M   | MT                     | 1998             | 11                 | GM1437        | 15,972                                    |
| TA20       | CAGACTGT | Samwise | SAM   | Ch-073 | F   | KK                     | 2001             | 7                  | GM1438        | 17,732                                    |
| TA21       | CAGATCTG | Flirt   | FLI   | Ch-012 | F   | KK                     | 1998             | 10                 | GM1440        | 12,804                                    |
| TA22       | CAGTCTGA | Sifa    | SIF   | Ch-029 | F   | KK                     | 1978             | 30                 | GM1442        | 14,580                                    |
| TA23       | CATCGATG | Wilkie  | WL    | Ch-035 | M   | KK                     | 1972             | 36                 | GM1446        | 14,136                                    |
| TA24       | CATGACGT | Dilly   | DL    | Ch-002 | F   | KK                     | 1986             | 22                 | GM1448        | 13,234                                    |
| TA25       | CATGTCGA | Sparrow | SW    | Ch-031 | F   | KK                     | 1958             | 50                 | GM1452        | 15,817                                    |
| TA26       | CGATGCAT | Trezia  | TZ    | Ch-050 | F   | KK                     | 1978             | 30                 | GM1455        | 12,567                                    |
| TA27       | CGTAGCTA | Baroza  | BRZ   | Ch-090 | M   | KK                     | 2005             | 3                  | GM1457        | 15,139                                    |

|      |            |           |     |        |   |    |      |    |        |        |
|------|------------|-----------|-----|--------|---|----|------|----|--------|--------|
| TA28 | CTACGTAG   | Zella     | ZEL | Ch-061 | F | KK | 1999 | 9  | GM1459 | 13,647 |
| TA29 | CTACTGCT   | Darbee    | DB  | Ch-044 | F | MT | 1984 | 25 | GM1465 | 14,077 |
| TA30 | CTAGTCGA   | Gaia      | GA  | Ch-015 | F | KK | 1993 | 16 | GM1467 | 15,085 |
| TA31 | CTCACTGT   | Diaz      | DIA | Ch-097 | F | KK | 2005 | 3  | GM1468 | 13,306 |
| TA32 | CTCAGACA   | Maybee    | MAY | Ch-094 | F | MT | 2006 | 3  | GM1474 | 12,237 |
| TA34 | CTGACAGT   | Nuru      | NUR | Ch-079 | F | KK | 1990 | 18 | GM1476 | 11,402 |
| TA35 | CTGTCAGA   | Sandi     | SA  | Ch-025 | F | KK | 1973 | 35 | GM1480 | 12,464 |
| TA36 | TACGCGAT   | Rumumba   | RUM | Ch-096 | F | MT | 1997 | 11 | GM1482 | 12,164 |
| TA37 | TAGCTACG   | Fansi     | FAN | Ch-068 | M | MT | 2001 | 7  | GM1485 | 11,037 |
| TA38 | TCACGACA   | Edgar     | EDG | Ch-059 | M | MT | 1989 | 19 | GM1494 | 11,410 |
| TA39 | TCACTGAG   | Sampson   | SN  | Ch-054 | M | KK | 1996 | 12 | GM1496 | 9,893  |
| TA40 | TCAGTCAG   | Eva       | EVA | Ch-049 | F | MT | 1965 | 43 | GM1497 | 9,141  |
| TA51 | TCTCGTCA   | Fundi     | FND | Ch-014 | M | KK | 2000 | 8  | GM1500 | 9,736  |
| TA52 | ACACGATGCT | Gremlin   | GM  | Ch-001 | F | KK | 1970 | 30 | GM7    | 9,159  |
| TA53 | CACATGCTAG | Freud     | FD  | Ch-005 | M | KK | 1971 | 37 | GM1501 | 9,774  |
| TA54 | CACTCTACTG | Ferdinand | FE  | Ch-010 | M | KK | 1992 | 16 | GM1502 | 8,323  |
| TA55 | CGAGCTAGCT | Forest    | FOR | Ch-065 | M | MT | 1997 | 11 | GM1504 | 9,143  |
| TA56 | CTAGCATGCT | Fudge     | FU  | Ch-051 | M | KK | 1996 | 12 | GM1507 | 9,738  |
| TA57 | CTATCGTACG | Jiffy     | JF  | Ch-057 | F | KK | 1973 | 35 | GM1509 | 10,422 |
| TA58 | CTCGTATACG | Konyagi   | KON | Ch-066 | F | MT | 1984 | 24 | GM1511 | 8,721  |
| TA59 | TGATATCGCG | Sheldon   | SL  | Ch-027 | M | KK | 1983 | 25 | GM1515 | 10,225 |
| TA60 | TGCGATATCG | Yamaha    | YAM | Ch-055 | F | KK | 1998 | 10 | GM1520 | 9,616  |
| TA61 | TGCGATCGTA | Kris      | KS  | Ch-020 | M | KK | 1982 | 27 | GM1527 | 8,545  |

<sup>1</sup>Community affiliation at time of sampling KK= Kasekela, MT= Mitumba

<sup>2</sup>Year of birth

<sup>3</sup>Includes phylogenetically uninformative reads

**Table S2.** Summary of 99% phylotypes used in the analysis of all great ape samples

| Sample tag | Name <sup>1</sup> | Ape    | Gender | Popu-<br>lation | Sample<br>number | Collection<br>date | Common<br>name | Location | Abbreviation | No. of Reads | No. of OTUs |
|------------|-------------------|--------|--------|-----------------|------------------|--------------------|----------------|----------|--------------|--------------|-------------|
| TA01       | Gremlin           | Ch-001 | F      | KK              | GM7              | 8-Nov-00           | Chimp          | Gombe    | Pts          | 12,740       | 1,150       |
| TA05       | Gremlin           | Ch-001 | F      | KK              | GM7              | 8-Nov-00           | Chimp          | Gombe    | Pts          | 16,263       | 1,254       |
| TA52       | Gremlin           | Ch-001 | F      | KK              | GM7              | 8-Nov-00           | Chimp          | Gombe    | Pts          | 8,120        | 952         |
| TA14       | Gremlin           | Ch-001 | F      | KK              | GM91             | 31-Dec-01          | Chimp          | Gombe    | Pts          | 12,181       | 1,091       |
| TA08       | Gremlin           | Ch-001 | F      | KK              | GM1475           | 21-Oct-08          | Chimp          | Gombe    | Pts          | 13,870       | 713         |
| TA24       | Dilly             | Ch-002 | F      | KK              | GM1448           | 27-Oct-08          | Chimp          | Gombe    | Pts          | 12,465       | 644         |
| TA06       | Tubi              | Ch-003 | M      | KK              | GM15             | 20-Nov-00          | Chimp          | Gombe    | Pts          | 20,380       | 1,002       |
| TA10       | Tubi              | Ch-003 | M      | KK              | GM64             | 11-Dec-01          | Chimp          | Gombe    | Pts          | 15,098       | 650         |
| TA16       | Tubi              | Ch-003 | M      | KK              | GM1343           | 16-Apr-08          | Chimp          | Gombe    | Pts          | 14,369       | 751         |
| TA53       | Freud             | Ch-005 | M      | KK              | GM1501           | 15-Oct-08          | Chimp          | Gombe    | Pts          | 9,053        | 624         |
| TA54       | Ferdinand         | Ch-010 | M      | KK              | GM1502           | 16-Nov-08          | Chimp          | Gombe    | Pts          | 7,751        | 435         |
| TA21       | Flirt             | Ch-012 | F      | KK              | GM1440           | 21-Oct-08          | Chimp          | Gombe    | Pts          | 11,283       | 1,021       |
| TA51       | Fundi             | Ch-014 | M      | KK              | GM1500           | 21-Oct-08          | Chimp          | Gombe    | Pts          | 9,078        | 669         |
| TA30       | Gaia              | Ch-015 | F      | KK              | GM1467           | 15-Oct-08          | Chimp          | Gombe    | Pts          | 13,997       | 884         |
| TA07       | Kris              | Ch-020 | M      | KK              | GM20             | 10-Nov-00          | Chimp          | Gombe    | Pts          | 11,433       | 763         |
| TA13       | Kris              | Ch-020 | M      | KK              | GM76             | 15-Dec-01          | Chimp          | Gombe    | Pts          | 13,206       | 897         |
| TA61       | Kris              | Ch-020 | M      | KK              | GM1527           | 9-Oct-08           | Chimp          | Gombe    | Pts          | 8,072        | 448         |
| TA18       | Pax               | Ch-023 | M      | KK              | GM1436           | 21-Oct-08          | Chimp          | Gombe    | Pts          | 14,896       | 722         |
| TA09       | Sandi             | Ch-025 | F      | KK              | GM41             | 24-Dec-01          | Chimp          | Gombe    | Pts          | 15,471       | 669         |
| TA35       | Sandi             | Ch-025 | F      | KK              | GM1480           | 21-Oct-08          | Chimp          | Gombe    | Pts          | 11,651       | 590         |
| TA03       | Sheldon           | Ch-027 | M      | KK              | GM10             | 10-Nov-00          | Chimp          | Gombe    | Pts          | 12,676       | 735         |
| TA11       | Sheldon           | Ch-027 | M      | KK              | GM74             | 24-Dec-01          | Chimp          | Gombe    | Pts          | 13,123       | 583         |
| TA59       | Sheldon           | Ch-027 | M      | KK              | GM1515           | 17-Oct-08          | Chimp          | Gombe    | Pts          | 9,421        | 607         |
| TA22       | Sifa              | Ch-029 | F      | KK              | GM1442           | 2-Nov-08           | Chimp          | Gombe    | Pts          | 13,547       | 586         |
| TA04       | Sparrow           | Ch-031 | F      | KK              | GM11             | 6-Nov-00           | Chimp          | Gombe    | Pts          | 14,085       | 699         |
| TA25       | Sparrow           | Ch-031 | F      | KK              | GM1452           | 15-Oct-08          | Chimp          | Gombe    | Pts          | 14,808       | 743         |
| TA23       | Wilkie            | Ch-035 | M      | KK              | GM1446           | 17-Oct-08          | Chimp          | Gombe    | Pts          | 13,011       | 616         |
| TA17       | Aphro             | Ch-042 | F      | MT              | GM1435           | 14-Oct-08          | Chimp          | Gombe    | Pts          | 13,126       | 669         |
| TA02       | Darbee            | Ch-044 | F      | MT              | GM9              | 26-Oct-00          | Chimp          | Gombe    | Pts          | 11,484       | 897         |
| TA15       | Darbee            | Ch-044 | F      | MT              | GM104            | 30-Dec-01          | Chimp          | Gombe    | Pts          | 10,952       | 996         |
| TA29       | Darbee            | Ch-044 | F      | MT              | GM1465           | 30-Sep-08          | Chimp          | Gombe    | Pts          | 12,879       | 622         |
| TA40       | Eva               | Ch-049 | F      | MT              | GM1497           | 11-Oct-08          | Chimp          | Gombe    | Pts          | 8,513        | 620         |
| TA26       | Trezia            | Ch-050 | F      | KK              | GM1455           | 7-Nov-08           | Chimp          | Gombe    | Pts          | 11,569       | 713         |

|         |         |           |      |      |         |           |         |                |     |         |       |
|---------|---------|-----------|------|------|---------|-----------|---------|----------------|-----|---------|-------|
| TA56    | Fudge   | Ch-051    | M    | KK   | GM1507  | 21-Oct-08 | Chimp   | Gombe          | Pts | 8,854   | 728   |
| TA39    | Sampson | Ch-054    | M    | KK   | GM1496  | 21-Oct-08 | Chimp   | Gombe          | Pts | 9,332   | 270   |
| TA60    | Yamaha  | Ch-055    | F    | KK   | GM1520  | 23-Oct-08 | Chimp   | Gombe          | Pts | 8,952   | 554   |
| TA57    | Jiffy   | Ch-057    | F    | KK   | GM1509  | 24-Nov-08 | Chimp   | Gombe          | Pts | 8,998   | 959   |
| TA38    | Edgar   | Ch-059    | M    | MT   | GM1494  | 10-Nov-08 | Chimp   | Gombe          | Pts | 10,677  | 609   |
| TA28    | Zella   | Ch-061    | F    | KK   | GM1459  | 17-Oct-08 | Chimp   | Gombe          | Pts | 12,355  | 712   |
| TA19    | Apple   | Ch-063    | M    | MT   | GM1437  | 19-Nov-08 | Chimp   | Gombe          | Pts | 14,767  | 631   |
| TA55    | Forest  | Ch-065    | M    | MT   | GM1504  | 13-Nov-08 | Chimp   | Gombe          | Pts | 8,630   | 509   |
| TA58    | Konyagi | Ch-066    | F    | MT   | GM1511  | 21-Oct-08 | Chimp   | Gombe          | Pts | 8,199   | 491   |
| TA37    | Fansi   | Ch-068    | M    | MT   | GM1485  | 23-Oct-08 | Chimp   | Gombe          | Pts | 9,891   | 659   |
| TA20    | Samwise | Ch-073    | F    | KK   | GM1438  | 17-Oct-08 | Chimp   | Gombe          | Pts | 16,700  | 513   |
| TA34    | Nuru    | Ch-079    | F    | KK   | GM1476  | 21-Oct-08 | Chimp   | Gombe          | Pts | 10,551  | 618   |
| TA27    | Baroza  | Ch-090    | M    | KK   | GM1457  | 4-Dec-08  | Chimp   | Gombe          | Pts | 13,925  | 834   |
| TA32    | Maybee  | Ch-094    | F    | MT   | GM1474  | 24-Nov-08 | Chimp   | Gombe          | Pts | 10,692  | 814   |
| TA36    | Rumumba | Ch-096    | F    | MT   | GM1482  | 18-Oct-08 | Chimp   | Gombe          | Pts | 11,219  | 679   |
| TA31    | Diaz    | Ch-097    | F    | KK   | GM1468  | 21-Nov-08 | Chimp   | Gombe          | Pts | 11,677  | 710   |
| LK645   | n.a.    | B_KSG0645 | n.a. | n.a. | KSG0645 | 24-Mar-06 | Bonobo  | Lui-kotal, DRC | Pp  | 13,299  | 728   |
| LK647   | n.a.    | B_KSG0647 | n.a. | n.a. | KSG0647 | 28-Mar-06 | Bonobo  | Lui-kotal, DRC | Pp  | 11,757  | 701   |
| LK652   | n.a.    | B_KSG0652 | n.a. | n.a. | KSG0652 | 6-Apr-06  | Bonobo  | Lui-kotal, DRC | Pp  | 5,120   | 385   |
| LK660   | n.a.    | B_KSG0660 | n.a. | n.a. | KSG0660 | 5-May-06  | Bonobo  | Lui-kotal, DRC | Pp  | 16,493  | 775   |
| LK673   | n.a.    | B_KSG0673 | n.a. | n.a. | KSG0673 | 17-May-06 | Bonobo  | Lui-kotal, DRC | Pp  | 16,251  | 880   |
| GM173   | Vincent | Cs_GM173  | M    | MT   | GM173   | 8-May-02  | Chimp   | Gombe          | Pts | 37,130  | 1,081 |
| BI242   | n.a.    | Cs_KSG242 | M    | n.a. | KSG242  | 12-May-05 | Chimp   | Babingi        | Pts | 7,273   | 305   |
| BI246   | n.a.    | Cs_KSG246 | F    | n.a. | KSG246  | 19-May-05 | Chimp   | Babingi        | Pts | 2,886   | 208   |
| WK12    | n.a.    | Cs_WLK12  | M    | n.a. | WLK12   | 10-May-04 | Chimp   | Walikale, DRC  | Pts | 4,790   | 368   |
| WK03    | n.a.    | Cs_WLK3   | F    | n.a. | WLK3    | 11-May-04 | Chimp   | Walikale, DRC  | Pts | 1,920   | 205   |
| MT334   | n.a.    | Ct_CR334  | F    | n.a. | CR334   | 1-Mar-04  | Chimp   | Minta          | Ptt | 11,094  | 749   |
| MT348   | n.a.    | Ct_CR348  | M    | n.a. | CR348   | 1-Mar-04  | Chimp   | Minta          | Ptt | 18,792  | 996   |
| WE464.1 | n.a.    | Ct_CR464  | n.a. | n.a. | CR464   | 28-May-04 | Chimp   | Wassa Emtse    | Ptt | 10,090  | 562   |
| CP469   | n.a.    | Ct_CR469  | F    | n.a. | CR469   | 12-May-04 | Chimp   | Campo Ma'an    | Ptt | 18,066  | 857   |
| CP470   | n.a.    | Ct_CR470  | M    | n.a. | CR470   | 14-May-04 | Chimp   | Campo Ma'an    | Ptt | 54,381  | 971   |
| BB089   | n.a.    | Ct_CR89   | M    | n.a. | CR89    | 7-Jun-03  | Chimp   | Boumba Bek     | Ptt | 32,984  | 1,309 |
| BB095   | n.a.    | Ct_CR95   | F    | n.a. | CR95    | 7-Jun-03  | Chimp   | Boumba Bek     | Ptt | 31,437  | 1,160 |
| WE464.2 | n.a.    | Ct_WCR464 | n.a. | n.a. | WCR464  | 28-May-04 | Chimp   | Wassa Emtse    | Ptt | 22,813  | 665   |
| WE457   | n.a.    | Cv_CR457  | F    | n.a. | CR457   | 28-May-04 | Chimp   | Wassa Emtse    | Pte | 44,128  | 1,168 |
| WE458   | n.a.    | Cv_CR458  | M    | n.a. | CR458   | 28-May-04 | Chimp   | Wassa Emtse    | Pte | 108,342 | 1,686 |
| ME2528  | n.a.    | G_CR2528  | n.a. | n.a. | CR2528  | 20-Jul-07 | Gorilla | Ndoki NP, CAP  | Gg  | 12,385  | 515   |

|        |      |           |      |      |         |           |         |               |    |        |     |
|--------|------|-----------|------|------|---------|-----------|---------|---------------|----|--------|-----|
| ME2530 | n.a. | G_CR2530  | n.a. | n.a. | CR2530  | 20-Jul-07 | Gorilla | Ndoki NP, CAP | Gg | 12,544 | 476 |
| KE1471 | n.a. | G_KSG1471 | n.a. | n.a. | KSG1471 | 26-Feb-07 | Gorilla | Walikale, DRC | Gb | 15,779 | 485 |
| KE1507 | n.a. | G_KSG1507 | n.a. | n.a. | KSG1507 | 26-Feb-07 | Gorilla | Walikale, DRC | Gb | 8,157  | 306 |
| KS477  | n.a. | H_KSG477  | M    | n.a. | KSG477  | 21-Dec-06 | Human   | Congo         | Hs | 1,190  | 52  |
| US1AZ  | n.a. | H_US1AZ   | M    | n.a. | US1AZ   | 3-Jun-08  | Human   | Arizona       | Hs | 831    | 100 |

<sup>1</sup>n.a. = Information not available

**Table S3.** Alpha diversity indices measured for Gombe chimpanzee samples

| Sample tag | Name      | Sex | Community <sup>1</sup> | YOB <sup>2</sup> | Sample number | Stage      | Collection year | Matriline <sup>3</sup> | Total no. of       |          |       |              |              |               |                |
|------------|-----------|-----|------------------------|------------------|---------------|------------|-----------------|------------------------|--------------------|----------|-------|--------------|--------------|---------------|----------------|
|            |           |     |                        |                  |               |            |                 |                        | reads <sup>4</sup> | 99% OTUs | Chao1 | Shannon's H' | Evenness (E) | OTU F:B ratio | Read F:B ratio |
| TA01       | Gremlin   | F   | KK                     | 1970             | GM7           | adult      | 2000            | G                      | 14,240             | 1,548    | 2,447 | 5.80         | 0.790        | 3.68          | 1.55           |
| TA02       | Darbee    | F   | MT                     | 1984             | GM9           | adult      | 2000            | B                      | 13,047             | 1,225    | 1,906 | 5.56         | 0.782        | 5.00          | 2.60           |
| TA03       | Sheldon   | M   | KK                     | 1983             | GM10          | adult      | 2000            | S                      | 13,860             | 977      | 1,306 | 5.30         | 0.770        | 4.18          | 3.35           |
| TA04       | Sparrow   | F   | KK                     | 1958             | GM11          | old        | 2000            | S                      | 15,297             | 868      | 1,214 | 5.25         | 0.776        | 3.72          | 2.80           |
| TA05       | Gremlin   | F   | KK                     | 1970             | GM7           | adult      | 2000            | G                      | 17,968             | 1,683    | 2,365 | 5.81         | 0.783        | 4.05          | 1.51           |
| TA06       | Tubi      | M   | KK                     | 1977             | GM15          | adult      | 2000            | B                      | 22,200             | 1,322    | 1,993 | 5.62         | 0.781        | 4.67          | 2.98           |
| TA07       | Kris      | M   | KK                     | 1982             | GM20          | adult      | 2000            | U                      | 12,530             | 913      | 1,299 | 5.00         | 0.733        | 3.75          | 0.85           |
| TA08       | Gremlin   | F   | KK                     | 1970             | GM1475        | old        | 2008            | G                      | 14,811             | 884      | 1,215 | 5.06         | 0.746        | 4.35          | 2.22           |
| TA09       | Sandi     | F   | KK                     | 1973             | GM41          | adult      | 2001            | S                      | 16,500             | 799      | 1,027 | 4.79         | 0.716        | 3.14          | 2.64           |
| TA10       | Tubi      | M   | KK                     | 1977             | GM64          | adult      | 2001            | B                      | 16,085             | 821      | 1,199 | 4.94         | 0.736        | 2.51          | 1.42           |
| TA11       | Sheldon   | M   | KK                     | 1983             | GM74          | adult      | 2001            | S                      | 13,971             | 751      | 1,062 | 5.03         | 0.760        | 3.22          | 2.95           |
| TA13       | Kris      | M   | KK                     | 1982             | GM76          | adult      | 2001            | U                      | 14,543             | 1,069    | 1,451 | 5.60         | 0.803        | 3.72          | 1.27           |
| TA14       | Gremlin   | F   | KK                     | 1970             | GM91          | adult      | 2001            | G                      | 13,426             | 1,440    | 2,178 | 5.75         | 0.791        | 3.94          | 1.99           |
| TA15       | Darbee    | F   | MT                     | 1984             | GM104         | adult      | 2001            | B                      | 12,265             | 1,203    | 1,637 | 5.80         | 0.818        | 4.85          | 1.89           |
| TA16       | Tubi      | M   | KK                     | 1977             | GM1343        | adult      | 2008            | B                      | 15,322             | 972      | 1,619 | 4.85         | 0.705        | 2.56          | 1.06           |
| TA17       | Aphro     | F   | MT                     | 1973             | GM1435        | old        | 2008            | A                      | 14,003             | 829      | 1,108 | 5.05         | 0.752        | 3.68          | 2.22           |
| TA18       | Pax       | M   | KK                     | 1977             | GM1436        | adult      | 2008            | U                      | 15,974             | 901      | 1,288 | 5.20         | 0.764        | 4.01          | 2.43           |
| TA19       | Apple     | M   | MT                     | 1998             | GM1437        | adolescent | 2008            | A                      | 15,805             | 779      | 1,070 | 5.14         | 0.772        | 3.70          | 3.39           |
| TA20       | Samwise   | F   | KK                     | 2001             | GM1438        | juvenile   | 2008            | S                      | 17,635             | 660      | 940   | 4.34         | 0.669        | 2.28          | 1.23           |
| TA21       | Flirt     | F   | KK                     | 1998             | GM1440        | adolescent | 2008            | F                      | 12,450             | 1,389    | 2,285 | 5.67         | 0.784        | 4.06          | 1.55           |
| TA22       | Sifa      | F   | KK                     | 1978             | GM1442        | adult      | 2008            | U                      | 14,437             | 737      | 1,063 | 5.05         | 0.765        | 5.27          | 3.85           |
| TA23       | Wilkie    | M   | KK                     | 1972             | GM1446        | old        | 2008            | U                      | 13,966             | 818      | 1,271 | 4.93         | 0.735        | 2.57          | 1.37           |
| TA24       | Dilly     | F   | KK                     | 1986             | GM1448        | adult      | 2008            | D                      | 13,196             | 802      | 1,201 | 4.91         | 0.735        | 2.46          | 1.49           |
| TA25       | Sparrow   | F   | KK                     | 1958             | GM1452        | old        | 2008            | S                      | 15,734             | 930      | 1,388 | 5.23         | 0.765        | 4.29          | 3.20           |
| TA26       | Trezia    | F   | KK                     | 1978             | GM1455        | adult      | 2008            | T                      | 12,481             | 895      | 1,262 | 5.17         | 0.761        | 4.93          | 5.76           |
| TA27       | Baroza    | M   | KK                     | 2005             | GM1457        | infant     | 2008            | U                      | 14,917             | 1,089    | 1,627 | 5.29         | 0.757        | 3.08          | 2.09           |
| TA28       | Zella     | F   | KK                     | 1999             | GM1459        | adolescent | 2008            | T                      | 13,343             | 977      | 1,550 | 5.23         | 0.760        | 2.82          | 1.80           |
| TA29       | Darbee    | F   | MT                     | 1984             | GM1465        | adult      | 2008            | B                      | 13,771             | 887      | 1,465 | 5.08         | 0.749        | 3.19          | 2.29           |
| TA30       | Gaia      | F   | KK                     | 1993             | GM1467        | adult      | 2008            | G                      | 14,935             | 1,063    | 1,424 | 5.36         | 0.769        | 5.06          | 2.94           |
| TA31       | Diaz      | F   | KK                     | 2005             | GM1468        | infant     | 2008            | D                      | 12,868             | 961      | 1,652 | 5.15         | 0.749        | 3.10          | 1.16           |
| TA32       | Maybee    | F   | MT                     | 2006             | GM1474        | infant     | 2008            | B                      | 11,947             | 995      | 1,297 | 5.69         | 0.824        | 8.48          | 4.21           |
| TA34       | Nuru      | F   | KK                     | 1990             | GM1476        | adult      | 2008            | U                      | 11,317             | 799      | 1,282 | 5.05         | 0.756        | 3.19          | 3.56           |
| TA35       | Sandi     | F   | KK                     | 1973             | GM1480        | old        | 2008            | S                      | 12,387             | 720      | 1,058 | 4.80         | 0.729        | 2.37          | 1.28           |
| TA36       | Rumumba   | F   | MT                     | 1997             | GM1482        | adolescent | 2008            | U                      | 12,087             | 865      | 1,267 | 5.33         | 0.788        | 3.87          | 3.56           |
| TA37       | Fansi     | M   | MT                     | 2001             | GM1485        | juvenile   | 2008            | F                      | 10,735             | 949      | 1,488 | 5.22         | 0.762        | 2.93          | 2.12           |
| TA38       | Edgar     | M   | MT                     | 1989             | GM1494        | adult      | 2008            | E                      | 11,340             | 754      | 1,138 | 5.11         | 0.771        | 3.29          | 2.81           |
| TA39       | Sampson   | M   | KK                     | 1996             | GM1496        | adolescent | 2008            | S                      | 9,823              | 326      | 493   | 2.79         | 0.482        | 2.05          | 5.53           |
| TA40       | Eva       | F   | MT                     | 1965             | GM1497        | old        | 2008            | E                      | 9,102              | 778      | 1,160 | 5.23         | 0.786        | 3.24          | 1.91           |
| TA51       | Fundi     | M   | KK                     | 2000             | GM1500        | juvenile   | 2008            | F                      | 9,668              | 820      | 1,193 | 5.38         | 0.801        | 3.75          | 2.95           |
| TA52       | Gremlin   | F   | KK                     | 1970             | GM7           | adult      | 2000            | G                      | 8,937              | 1,198    | 1,870 | 5.71         | 0.806        | 4.15          | 1.47           |
| TA53       | Freud     | M   | KK                     | 1971             | GM1501        | old        | 2008            | F                      | 9,714              | 785      | 1,170 | 4.69         | 0.703        | 3.36          | 1.02           |
| TA54       | Ferdinand | M   | KK                     | 1992             | GM1502        | adult      | 2008            | F                      | 8,265              | 518      | 737   | 4.65         | 0.744        | 2.04          | 1.62           |

|      |         |   |    |      |        |            |      |   |        |       |       |      |       |      |      |
|------|---------|---|----|------|--------|------------|------|---|--------|-------|-------|------|-------|------|------|
| TA55 | Forest  | M | MT | 1997 | GM1504 | adolescent | 2008 | F | 9,047  | 619   | 880   | 4.91 | 0.764 | 5.24 | 4.24 |
| TA56 | Fudge   | M | KK | 1996 | GM1507 | adolescent | 2008 | F | 9,588  | 955   | 1,596 | 5.23 | 0.762 | 3.27 | 1.74 |
| TA57 | Jiffy   | F | KK | 1973 | GM1509 | old        | 2008 | U | 10,052 | 1,120 | 1,505 | 5.77 | 0.821 | 6.85 | 2.51 |
| TA58 | Konyagi | F | MT | 1984 | GM1511 | adult      | 2008 | U | 8,696  | 582   | 858   | 4.72 | 0.741 | 3.82 | 4.44 |
| TA59 | Sheldon | M | KK | 1983 | GM1515 | adult      | 2008 | S | 10,165 | 725   | 1,014 | 5.00 | 0.759 | 4.32 | 4.68 |
| TA60 | Yamaha  | F | KK | 1998 | GM1520 | adolescent | 2008 | U | 9,592  | 690   | 1,016 | 5.12 | 0.784 | 4.20 | 4.45 |
| TA61 | Kris    | M | KK | 1982 | GM1527 | adult      | 2008 | U | 8,520  | 552   | 794   | 4.63 | 0.733 | 2.49 | 1.08 |

<sup>1</sup>Community affiliation at time of sampling KK= Kasekela, MT= Mitumba

<sup>2</sup>Year of birth

<sup>3</sup>G=Gremlin, B=Little Bee, A=Athena, D=Dilly, S=Sparrow, F=Fifi, T=Trusha,U=unknown

<sup>4</sup>Number of phylogenetically informative reads in 99% OTUs



**Table S4.** Alpha diversity indices calculated for longitudinally sampled chimps using iTag resequencing.

| Chimpanzee | Sex | Community <sup>1</sup> | YOB <sup>2</sup> | Collection date | Age when collected | Total No. of reads | No. of reads    |             | Chao1 | Shannon's H' | Evenness (E) |
|------------|-----|------------------------|------------------|-----------------|--------------------|--------------------|-----------------|-------------|-------|--------------|--------------|
|            |     |                        |                  |                 |                    |                    | No. of 99% OTUs | in 99% OTUs |       |              |              |
| Gremlin    | F   | KK                     | 1970             | 8-Nov-00        | 30                 | 58,682             | 418             | 24,889      | 463.2 | 4.75         | 0.79         |
|            |     |                        |                  | 31-Dec-01       | 31                 | 27,907             | 399             | 10,497      | 434.3 | 4.86         | 0.81         |
|            |     |                        |                  | 31-Jan-07       | 37                 | 41,370             | 444             | 21,369      | 464.8 | 4.80         | 0.79         |
|            |     |                        |                  | 21-Oct-08       | 38                 | 40,832             | 374             | 22,225      | 400.6 | 4.45         | 0.75         |
|            |     |                        |                  | 11-Oct-09       | 39                 | 37,527             | 422             | 20,962      | 442.0 | 4.76         | 0.79         |
| Tubi       | M   | KK                     | 1977             | 20-Nov-00       | 23                 | 44,216             | 403             | 23,574      | 420.5 | 4.78         | 0.80         |
|            |     |                        |                  | 11-Dec-01       | 24                 | 64,882             | 357             | 25,800      | 366.4 | 4.34         | 0.74         |
|            |     |                        |                  | 24-Apr-02       | 25                 | 32,242             | 337             | 18,179      | 394.2 | 4.02         | 0.69         |
|            |     |                        |                  | 16-Apr-08       | 31                 | 24,901             | 361             | 13,213      | 396.8 | 4.24         | 0.72         |
|            |     |                        |                  | 17-Sep-07       | 30                 | 40,430             | 369             | 22,729      | 390.1 | 4.28         | 0.72         |
|            |     |                        |                  | 9-Oct-09        | 32                 | 76,627             | 325             | 25,442      | 368.2 | 3.79         | 0.66         |
| Kris       | M   | KK                     | 1982             | 10-Nov-00       | 18                 | 34,402             | 354             | 17,537      | 393.1 | 4.54         | 0.77         |
|            |     |                        |                  | 15-Dec-01       | 19                 | 58,157             | 355             | 25,577      | 382.0 | 4.76         | 0.81         |
|            |     |                        |                  | 8-May-02        | 20                 | 29,549             | 353             | 13,507      | 390.0 | 4.57         | 0.78         |
|            |     |                        |                  | 7-Apr-07        | 25                 | 46,064             | 387             | 14,156      | 411.0 | 4.57         | 0.77         |
|            |     |                        |                  | 9-Oct-08        | 26                 | 43,281             | 351             | 23,546      | 372.6 | 3.81         | 0.65         |
|            |     |                        |                  | 9-Oct-09        | 27                 | 48,409             | 365             | 24,602      | 418.3 | 3.81         | 0.65         |
| Sandi      | F   | KK                     | 1973             | 14-Nov-00       | 27                 | 32,793             | 404             | 17,509      | 425.1 | 4.56         | 0.76         |
|            |     |                        |                  | 24-Dec-01       | 28                 | 51,009             | 370             | 25,180      | 408.3 | 4.24         | 0.72         |
|            |     |                        |                  | 5-Aug-03        | 30                 | 76,721             | 390             | 30,199      | 422.8 | 4.52         | 0.76         |
|            |     |                        |                  | 30-Jun-04       | 31                 | 43,517             | 328             | 24,893      | 340.8 | 3.93         | 0.68         |
|            |     |                        |                  | 21-Oct-08       | 35                 | 42,371             | 371             | 23,143      | 414.4 | 4.15         | 0.70         |
|            |     |                        |                  | 27-Sep-09       | 36                 | 44,540             | 393             | 20,428      | 414.6 | 4.38         | 0.73         |

|         |   |    |      |           |    |        |     |        |       |      |         |
|---------|---|----|------|-----------|----|--------|-----|--------|-------|------|---------|
| Sheldon | M | KK | 1983 | 10-Nov-00 | 17 | 45,318 | 361 | 23,973 | 395.7 | 4.17 | 0.71    |
|         |   |    |      | 24-Dec-01 | 18 | 50,240 | 349 | 25,580 | 379.9 | 4.06 | 0.69    |
|         |   |    |      | 27-Aug-03 | 20 | 37,438 | 349 | 21,855 | 366.6 | 4.33 | 0.74    |
|         |   |    |      | 30-Jan-07 | 24 | 51,887 | 328 | 23,613 | 389.2 | 4.22 | 0.73    |
|         |   |    |      | 17-Oct-08 | 25 | 41,672 | 384 | 22,429 | 426.5 | 4.18 | 0.70    |
|         |   |    |      | 8-Sep-09  | 26 | 31,884 | 373 | 15,863 | 407.9 | 4.65 | 0.79    |
| Sparrow | F | KK | 1958 | 6-Nov-00  | 42 | 50,347 | 404 | 27,137 | 435.1 | 4.83 | 0.80    |
|         |   |    |      | 16-Dec-01 | 43 | 36,502 | 371 | 19,587 | 385.5 | 4.80 | 0.81    |
|         |   |    |      | 26-Jan-07 | 49 | 38,037 | 383 | 20,658 | 426.4 | 4.40 | 0.74    |
|         |   |    |      | 15-Oct-08 | 50 | 60,380 | 383 | 35,091 | 407.8 | 4.11 | 0.69    |
| Darbee  | F | MT | 1984 | 26-Oct-00 | 16 | 39,375 | 347 | 19,392 | 361.6 | 4.68 | 0.80047 |
|         |   |    |      | 30-Dec-01 | 17 | 51,668 | 375 | 22,635 | 396.7 | 4.75 | 0.80198 |
|         |   |    |      | 10-Jun-04 | 20 | 54,386 | 358 | 29,825 | 391.5 | 3.94 | 0.66967 |
|         |   |    |      | 6-May-06  | 22 | 48,400 | 333 | 25,729 | 352.8 | 3.85 | 0.66246 |
|         |   |    |      | 30-Sep-08 | 24 | 54,683 | 343 | 28,143 | 370.4 | 4.02 | 0.68934 |
|         |   |    |      | 28-Oct-09 | 25 | 52,066 | 392 | 28,063 | 405.6 | 4.55 | 0.76123 |

<sup>1</sup>Community affiliation at time of sampling KK= Kasekela, MT= Mitumba

<sup>2</sup>Year of birth
